# Supplementary material for: There is a specific response to pH by isolates of Haemophilus influenzae and this has a direct influence on biofilm formation
Source: PubMed Central journal article supplement (PMC3938079; doi:10.1186/1471-2180-14-47), 2014-02-21
Supplement: 1471-2180-14-47-S1.pdf [file 1471-2180-14-47-S1.pdf]

**Table S1: Summary information of the strains used in this study.**

| <b>Strain</b>     | <b>Genotype</b>            | <b>Source isolated</b>         |
|-------------------|----------------------------|--------------------------------|
| Rd KW20           | Serotype d, non - capsular | Lab strain                     |
| 285               | non-typeable (NTHi)        | Otitis Media                   |
| 86-028NP          | NTHi                       | Otitis Media                   |
| <b>86.0276MEE</b> | NTHi                       | Otitis Media                   |
| <b>C486</b>       | NTHi                       | Otitis Media                   |
| Eagan             | Serotype b, capsular       | Cerebral Serum Fluid           |
| Hi667             | NTHi                       | Otitis Media                   |
| <b>R2846</b>      | NTHi                       | Otitis Media                   |
| R2866             | NTHi                       | Blood                          |
| R3264             | NTHi                       | Middle ear of Healthy<br>Child |
| <b>165</b>        | NTHi                       | Otitis Media                   |

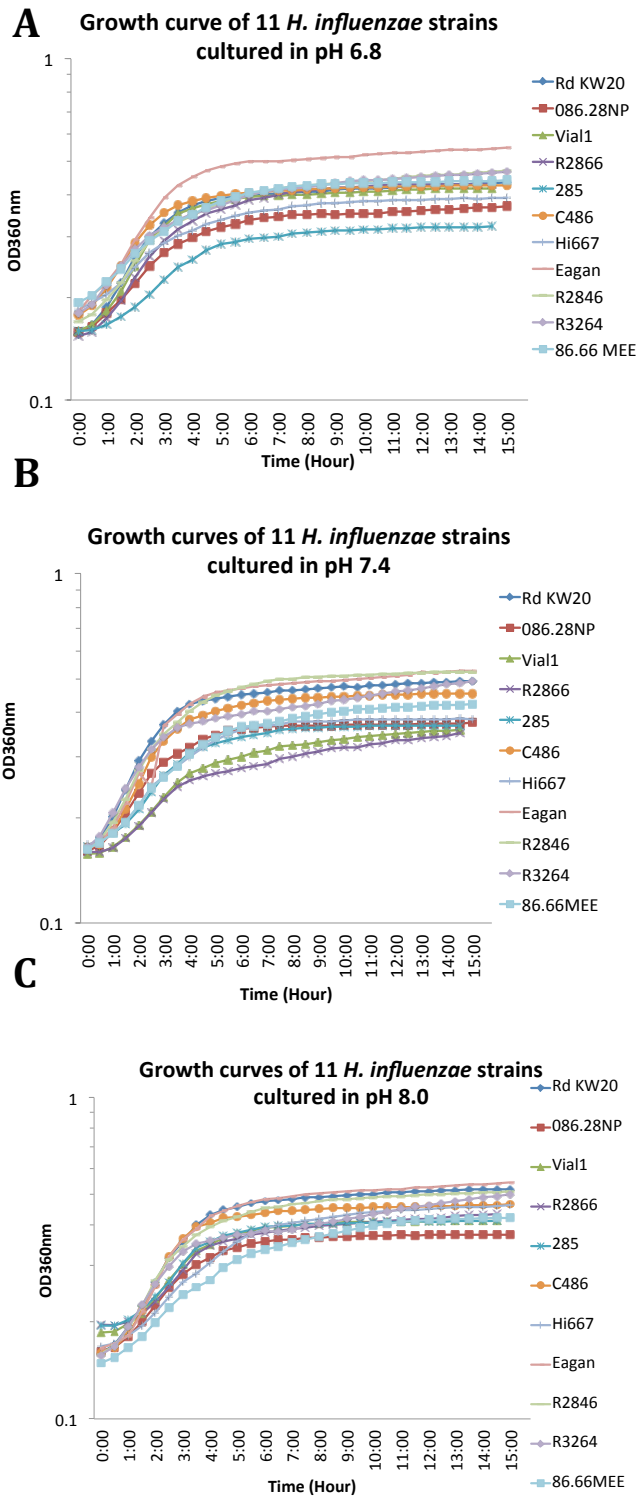

**Figure S1: The growth profile of different strains of *H. influenzae* grown under different pH.** The *H. influenzae* isolates as indicated were grown in HI broth pre-culture before a normalized amount inoculated into media at (A) pH 6.8, (B) pH 7.4 and (C) pH 8.0.

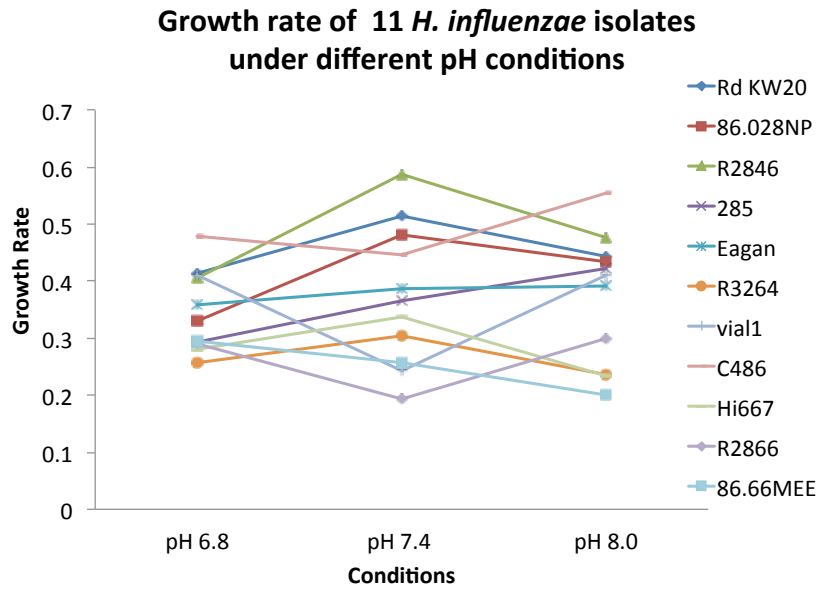

**Figure S2: The growth rates of *H. influenzae* strains under different pH.** The growth rates were calculated from Fig S1 and plotted.

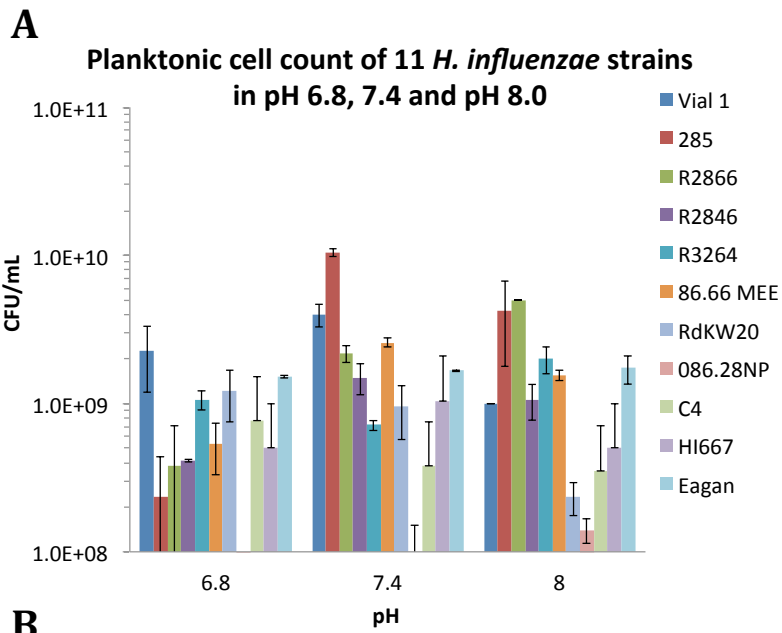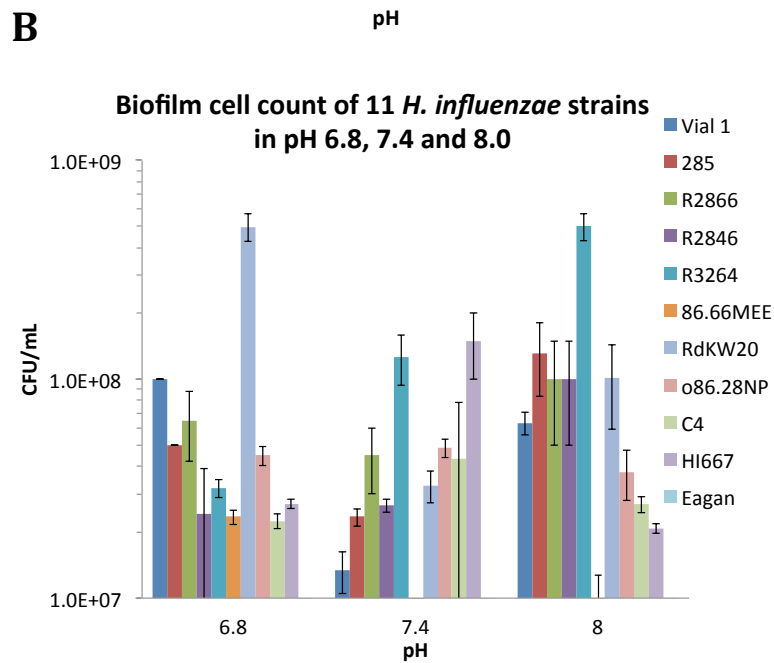

**Figure S3: Viable cell counts of different *H. influenzae* strains grown under pH 6.8, 7.4 and 8.0.** The isolates were grown and viable cells counted for the (A) planktonic cell number (CFU/ml) and concurrently the (B) biofilm cell number.

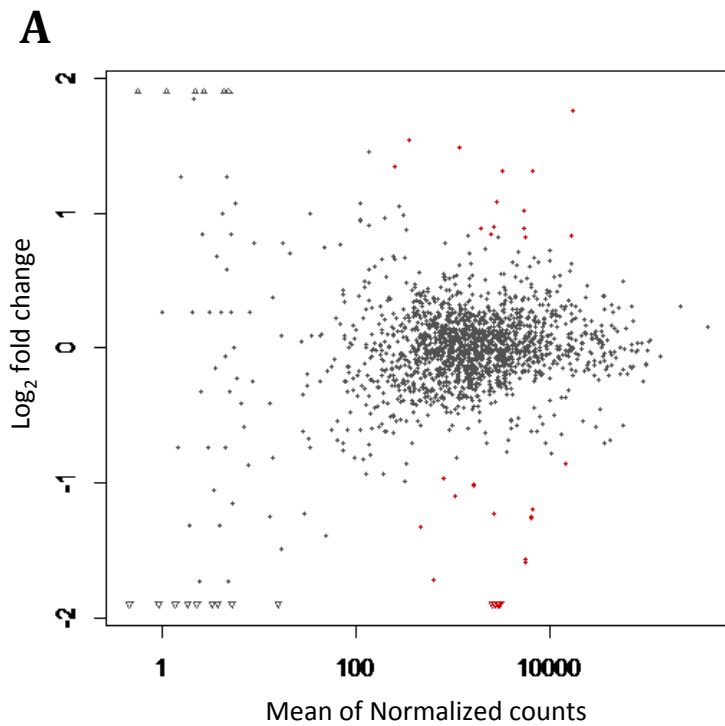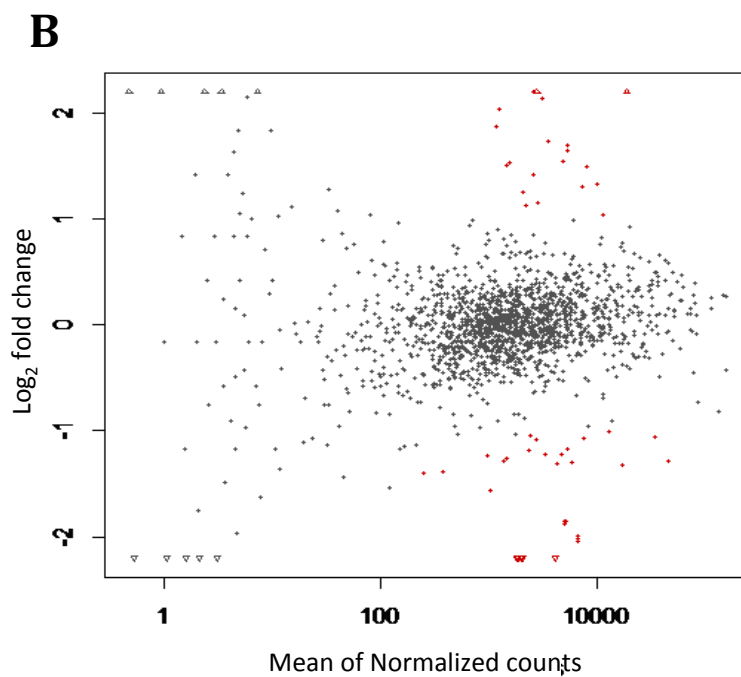

**Figure S4: Scatter plots of  $\log_2$  fold change against normalized counts for each of the genes identified from mRNAseq.** Each dot represents a gene identified from the RNA sequencing library and then compared for counts in the library from pH 8.0 compared to pH 6.8 for (A) R3264 and then for (B) Eagan. The dots that red are those genes determined as being significantly differentially expressed with  $p$ -value < 0.05 and FDR < 10%.
